## P727

**Unexpected ventricular aneurysm: further ischemic aetiology.**

Vieitez Florez JM.; Hinojar R.; Pascual M.; Ramos J.; Jimenez Nacher JJ.; Sanchez D.; Carvelli A.; Esteban A.; Kristo D.; Moya JL.; Abellas M.; Lorente A.; Zamorano JL.; Fernandez-Golfin C.

University Hospital Ramon y Cajal de Madrid, Cardiology, Madrid, Spain

**Introduction:** Ventricular aneurysm is an infrequent complication of myocardial infarction. In absence of an ischemic event, alternative aetiologies include: thoracic trauma, hypertrophic cardiomyopathy, myocarditis, Chagas disease, cardiac sarcoidosis or arrhythmogenic cardiomyopathy. In the absence of any of the previous, congenital aneurysm diagnosis is made.

**Case:** We present the case of 57-year-old man referred to cardiology department because a new onset of atrial fibrillation with left bundle branch block. Past medical history included high blood pressure and dyslipidaemia without any history or smoking, alcohol consumption or any other toxic abuse. No chest pain, shortness of breath or other significant symptoms were reported. Physical examination was unremarkable except for an arrhythmic pulse at 85-90 bpm.

Echocardiogram showed moderate dilated left ventricle with mild-moderate LV dysfunction (EF 40% ) with a septal aneurysm of 2.4x1cm (Picture A). A coronary CT was performed that ruled out coronary heart disease and confirmed the presence of the septal aneurysm (Picture B). To better characterize this image, a cardiac magnetic resonance (CMR) was performed. Moderate dilated LV with significant dysfunction (EF 31%) was reported. A septal aneurysm of 13 x 22 x 33 mm composed of a 2.8 mm thin wall of true myocardial tissue was documented (picture C and D-late gadolinium enhance). No myocardial delayed enhancement was detected in any area of the LV. Moreover, no signs of myocardial non compaction, arrhythmogenic cardiomyopathy, hypertrophic cardiomyopathy or myocarditis were seen. Chagas serology as well as sarcoidosis diagnosis work up were negative. Patient denied any thoracic traumatism. Congenital aneurysm diagnosis was finally established.

Electrical cardioversion was performed after 1 month of correct oral anticoagulation and heart failure treatment was started. Case was presented in the Heart Team session and a conservative management was decided based on asymptomatic status and absence of ventricular arrhythmias. After 3 years of clinical follow up, the patient is in good status, asymptomatic and in sinus rhythm. Discussion: Congenital ventricular aneurysm is a rare cardiac malformation that arises during the fourth embryonic week. Most frequently, left ventricular aneurysms are found in the apex and the perivalvular area, being the septal location an atypical one. Most patients are asymptomatic but when symptoms occur, they are mostly related to the presence of ventricular arrhythmias. Aneurysm rupture incidence is variable, ranging from 3.7% to 12 % according to the different series. For this reason, surgery is recommended in symptomatic patients. However, management of asymptomatic patients is not clear since prognosis studies are lacking.

Abstract P727 Figure. A.Echo B.-CT C.-CMR. D.-CMR gadolinium

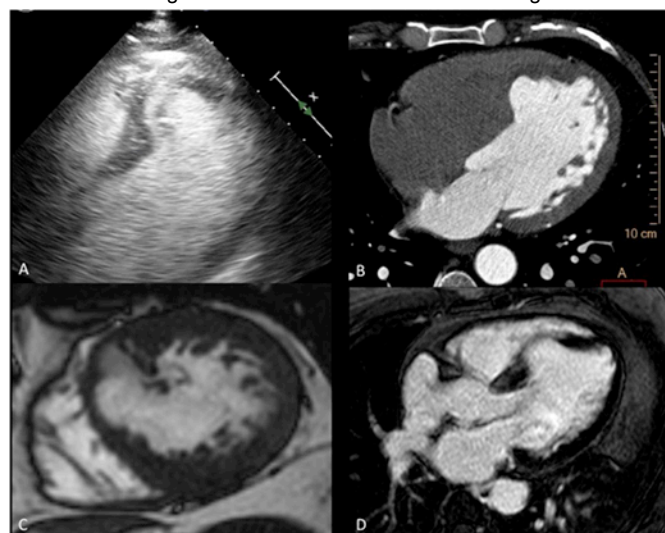

Source: http://academic.oup.com/ehjcimaging/article-pdf/21/Supplement_1/jez319.399/31863774/jez319.399.pdf
